# Supplementary material
Source: PubMed Central journal article supplement (PMC4542231)
Supplement: AEM.01822-15_zam999116550so1.pdf [file AEM.01822-15_zam999116550so1.pdf]

## **Microbial toluene removal in hypoxic model constructed wetlands occurs predominantly via the ring monooxygenation pathway**

Martinez-Lavanchy, P. M.<sup>1,2</sup>, Chen, Z.<sup>1</sup>, Lünsmann, V.<sup>1,3</sup>, Marin-Cevada, V.<sup>1</sup>, Vilchez-Vargas, R.<sup>4#</sup>, Pieper, D.H.<sup>4</sup>, Reiche, N.<sup>1</sup>, Kappelmeyer, U.<sup>1</sup>, Imperato, V.<sup>1§</sup>, Junca, H.<sup>5</sup> Nijenhuis, I.<sup>6</sup>, Müller, J.A.<sup>1</sup>, Kuschik, P.<sup>1</sup>, and Heipieper, H.J.<sup>1</sup>

<sup>1</sup> Department of Environmental Biotechnology, Helmholtz Centre for Environmental Research - UFZ, Permoserstrasse 15, 04318 Leipzig, Germany

<sup>2</sup> Department of Environmental Microbiology, Helmholtz Centre for Environmental Research - UFZ, Permoserstrasse 15, 04318 Leipzig, Germany

<sup>3</sup> Department of Proteomics, Helmholtz Centre for Environmental Research - UFZ, Permoserstrasse 15, 04318 Leipzig, Germany

<sup>4</sup> Microbial Interactions and Processes Research Group, Helmholtz Centre for Infection Research - HZI, Inhoffenstrasse 7, 38124 Braunschweig, Germany

<sup>5</sup> RG Microbial Ecology: Metabolism, Genomics & Evolution | CorpoGen, Carrera 5 No. 66A-34, 110231, Bogota DC, Colombia.

<sup>6</sup> Department of Isotope Biogeochemistry, Helmholtz Centre for Environmental Research - UFZ, Permoserstrasse 15, 04318 Leipzig, Germany

<sup>#</sup>Present address: Laboratory of Microbial Ecology and Technology (LabMET), University of Ghent, Ghent, Belgium

<sup>§</sup>Present address: Department of Environmental Science, Aarhus University, Frederiksborgvej 399, 4000 Roskilde, Denmark

**\*Corresponding author:** Hermann J. Heipieper. Department of Environmental Biotechnology, UFZ Helmholtz Centre for Environmental Research. E-mail: [hermann.heipieper@ufz.de](mailto:hermann.heipieper@ufz.de). Tel.: +49 341 2351694

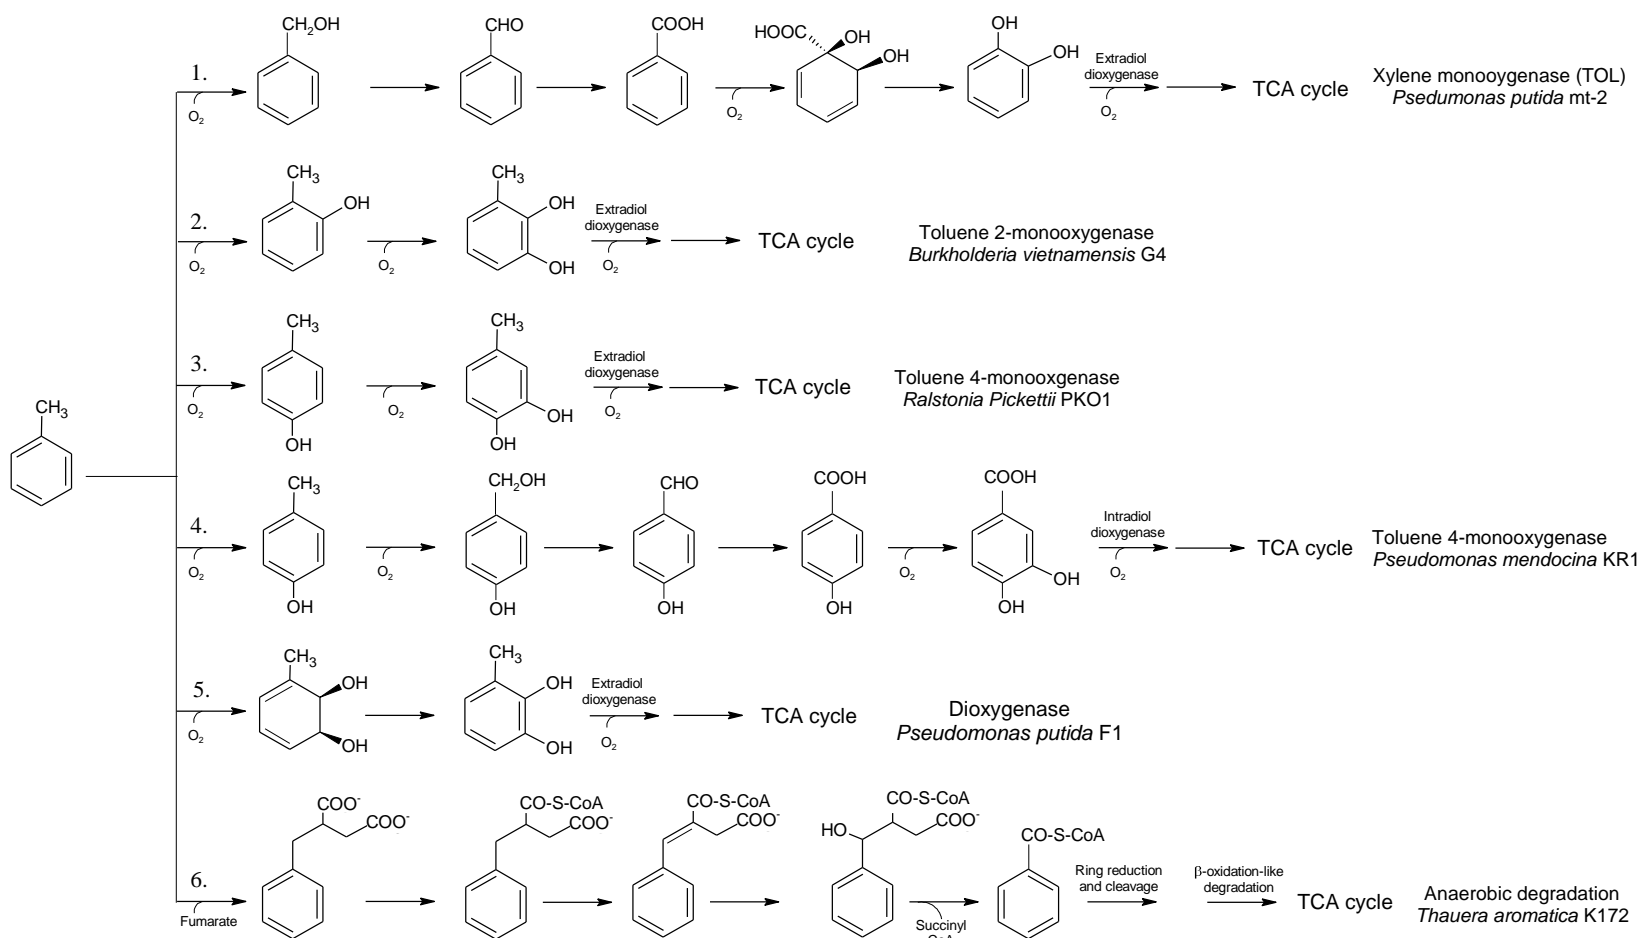

**Fig. S1.** Schematic representation of aerobic and anaerobic toluene degradation pathways in bacteria. The generic name of the pathway received according to the enzyme catalyzing the first step of the degradation and a model bacterial strain containing the respective pathway is given (Modified from (1)). The catabolic microarray showed that genes belonging to pathways number 1 and 3 were present in PFR-1 and pathways 3 and 6 were present in PFR-2.

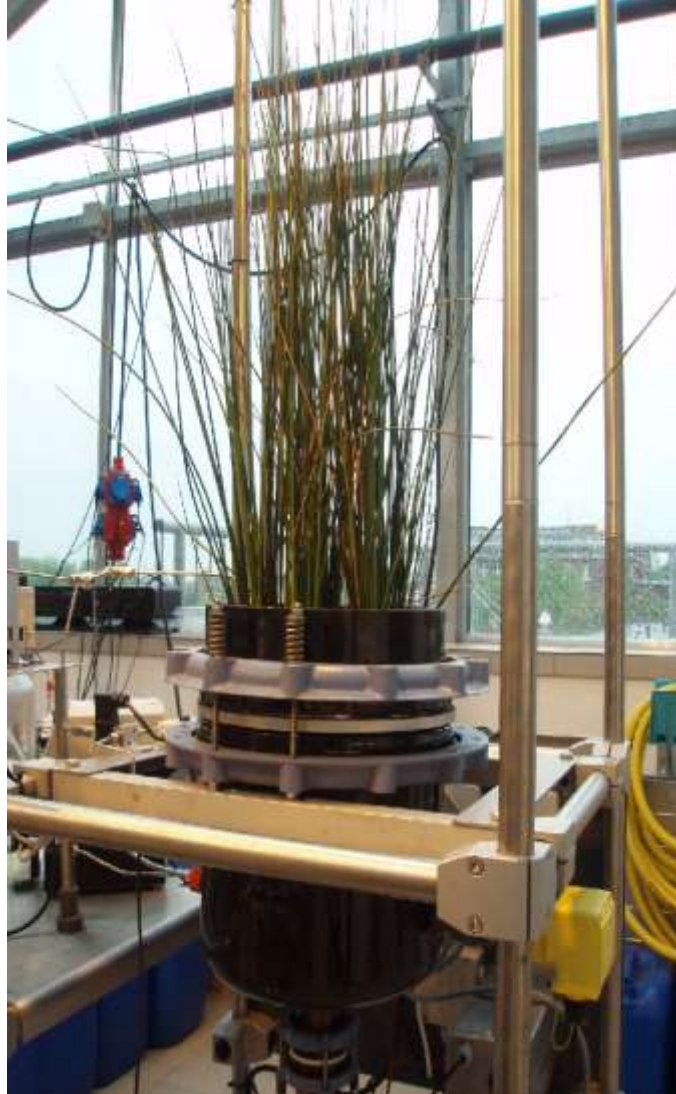

**Fig. S2. Planted Fixed-bed Reactor (PFR).** The reactor consists of a cylindrical glass vessel (diameter: 30 cm; height: 30 cm) containing a metal basket (diameter: 26 cm; height: 28 cm) filled with approximately 20 kg of gravel. The depicted reactor is planted with soft rush (*Juncus effusus*).

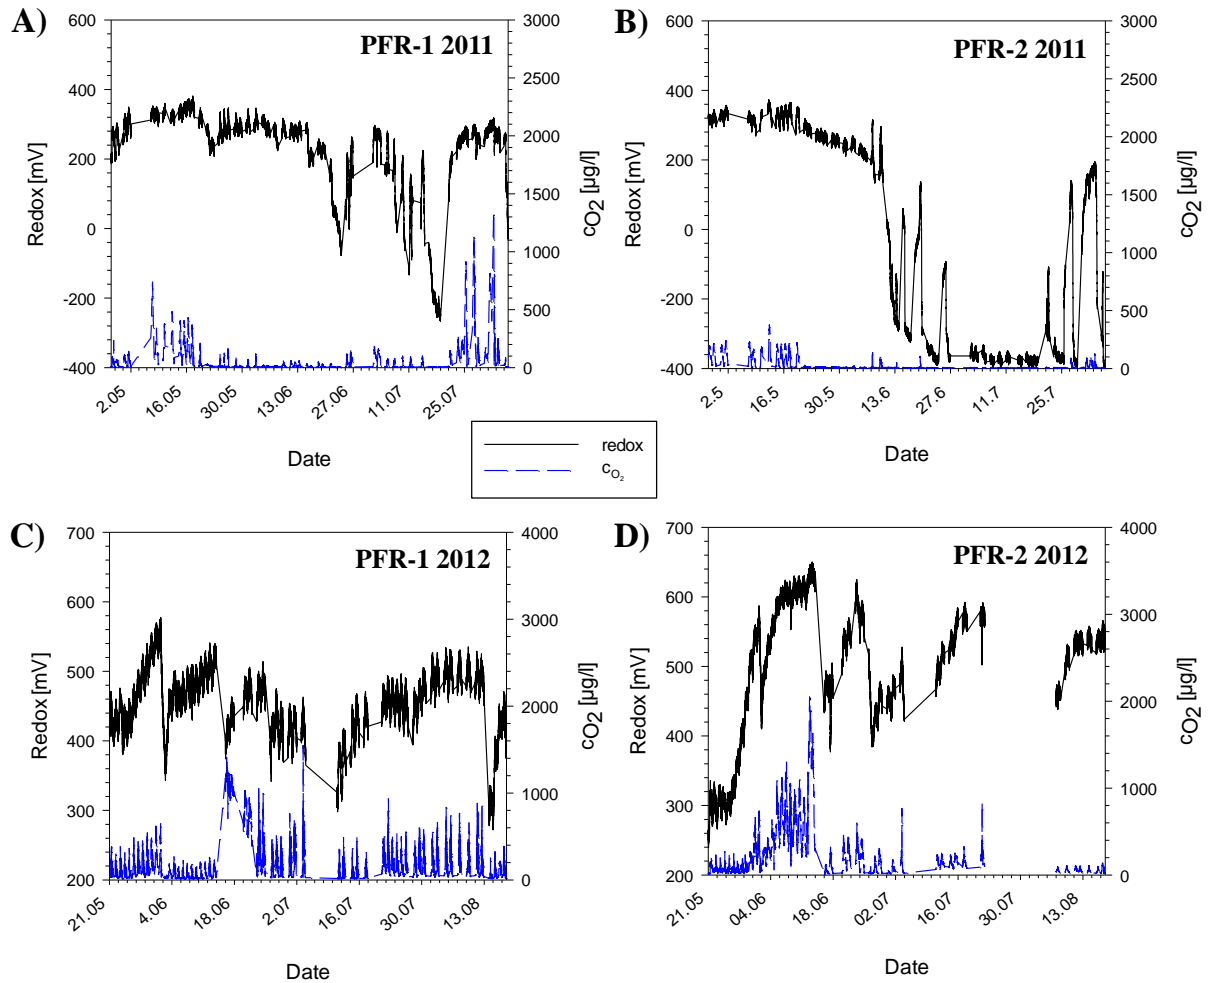

**Fig. S3.** Redox state and the oxygen concentrations inside the PFR-1 (A and C) and PFR-2 (B and D) monitored during the months of higher photosynthetic plant activity. The redox and dissolved oxygen concentration were constantly measured in the circulation flow and automatically recorded. From 22.07-06.08.2012 no registration of data was performed due to broken electrodes (Panel D).

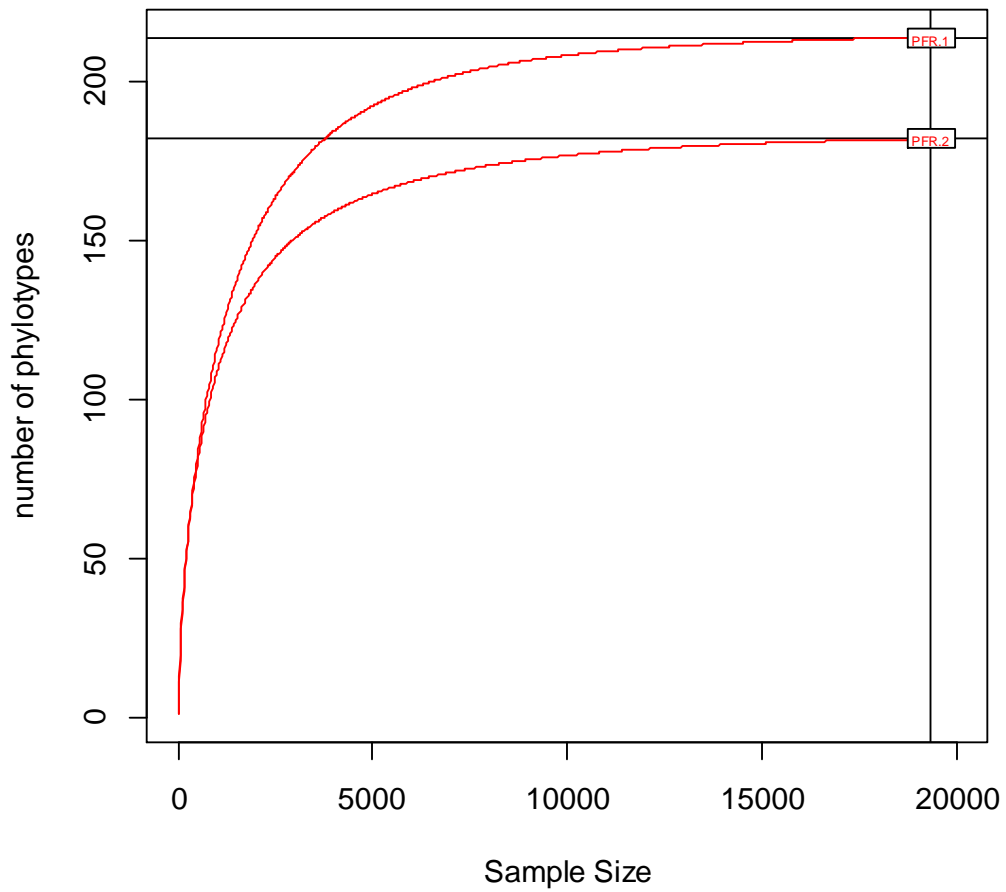

**Fig. S4. Rarefaction curves of PFR-1 and PFR-2.** The rarefaction curves show the species number against the sampling size for each PFR sampled.

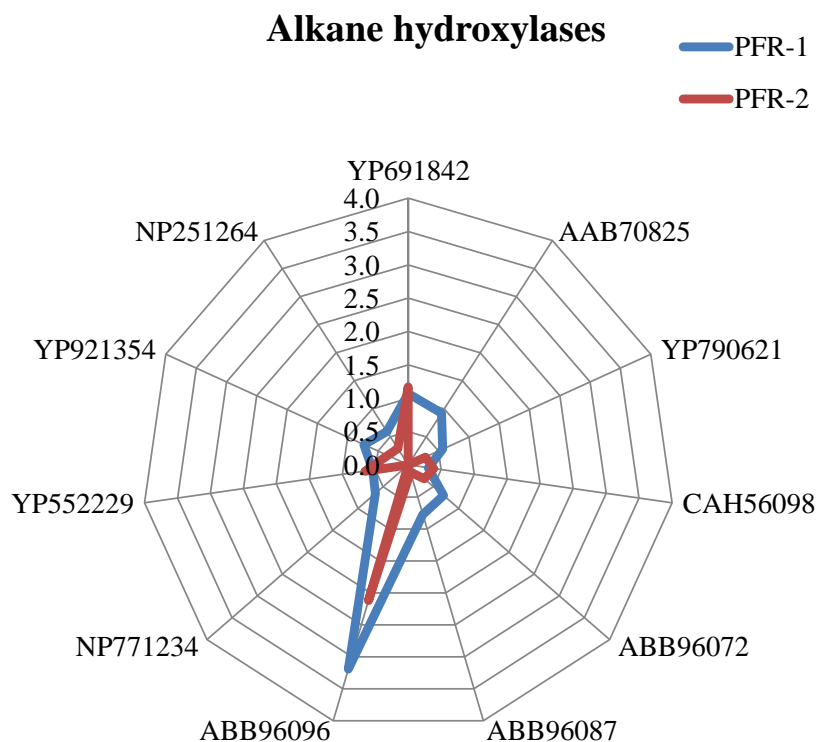

**Fig. S5.** Abundance of integral-membrane alkane hydroxylases present in PFR-1 and PFR-2 given as normalized intensity. YP\_691842: alkane-1 monooxygenase *Alcanivorax borkumensis* SK2; AAB70825: xylene monooxygenase hydroxylase component *Pseudomonas putida*; YP\_790621: Alkane-1 monooxygenase *Pseudomonas aeruginosa* UCBPP-PA14; CAH56098: putative alkane hydroxylase Uncultured bacterium; ABB96072, ABB96087, ABB96096: putative alkane monooxygenase Uncultured bacterium; NP\_771234: delta 9 acyl-lipid fatty acid desaturase *Bradyrhizobium diazoefficiens* USDA 110; YP\_552229: alkane 1-monooxygenase *Polaromonas* sp. JS666; YP\_921354: alkane 1-monooxygenase *Nocardioides* sp. JS614; NP\_251264: alkane-1 monooxygenase *Pseudomonas aeruginosa* PAO1.

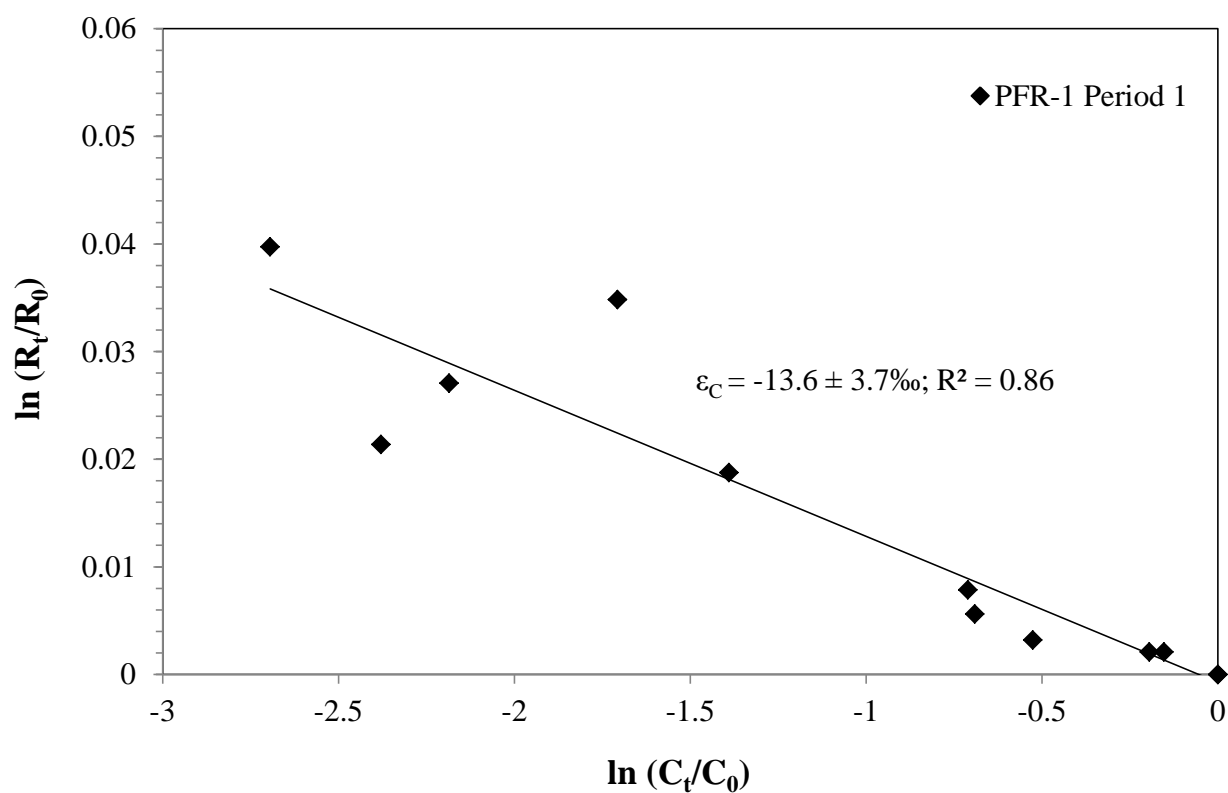

**Fig. S6.** Double logarithmic plot according to the Rayleigh equation of the hydrogen isotopic composition versus the residual concentration of toluene for PFR-1 during the Period 1, after the first injection pulse of toluene inside the reactor.

**Table S1.** Description of aerobic isolates representatives obtained from PFRs.

| Isolate                                    | Identification (GeneBank N°)                                       | Closest relative <sup>a</sup> (% Identity)      | Catabolic genes (GeneBank N°)                                                                           | Closest relative <sup>c</sup> (% Identity)                                                                                                                                                             |
|--------------------------------------------|--------------------------------------------------------------------|-------------------------------------------------|---------------------------------------------------------------------------------------------------------|--------------------------------------------------------------------------------------------------------------------------------------------------------------------------------------------------------|
| AET-5-01, AET-5-2a,<br>AET-5-3b, AET-5-47b | <i>Pseudomonas</i> sp. (KR902601,<br>KR902602, KR902603, KR902604) | <i>Pseudomonas monteilii</i> strain LZU-9 (100) | Xylene monooxygenase (KT021789)<br>Extradiol dioxygenase <sup>b</sup>                                   | xylene monooxygenase <i>Pseudomonas putida</i> (100)                                                                                                                                                   |
| AET-5-VIII, AET-5-3<br>AET-6-XI, AET-6-18  | <i>Pseudomonas</i> sp. (KR902606,<br>KR902605, KR902609, KR902608) | <i>Pseudomonas putida</i> strain YN3 (100)      | Toluene dioxygenase (KT021793)<br>Extradiol dioxygenase (KT021794)                                      | toluene dioxygenase <i>Pseudomonas</i> sp. KA-08 (100)<br>3-methylcatechol 2,3-dioxygenase <i>Pseudomonas putida</i> group (100)                                                                       |
| AET-6-14                                   | <i>Ralstonia</i> sp. (KR902607)                                    | <i>Ralstonia</i> sp. DT 4-07 (100)              | Toluene monooxygenase (KT021790)<br>Phenol monooxygenase (KT021791)<br>Extradiol dioxygenase (KT021792) | toluene-4-monooxygenase <i>Ralstonia pickettii</i> PKO1(99)<br>methane/phenol/toluene hydroxylase <i>Ralstonia pickettii</i> 12D (100)<br>catechol-2,3-dioxygenase <i>Ralstonia pickettii</i> 12D (97) |

<sup>a</sup>Closest relative according to 16S rRNA gene (blastn)

<sup>b</sup>DNA of the isolate AET-5-01 showed a positive reaction with Exdo-A primers (Brenerova et al., 2009). However, it was not possible to retrieve a clean sequence to describe this gene.

<sup>c</sup>Closest relative of nucleotide catabolic gene sequence against protein database (blastx)



**Table S2.** Primer sequences designed and used in this study to detect catabolic genes present in aerobic isolates through qPCR analysis.

| Primer name                  | Sequence (5'-3')                                  | Target gene (abbreviation <sup>a</sup> )                           | Annealing T (°C) | qPCR Efficiency (%) | Reference  |
|------------------------------|---------------------------------------------------|--------------------------------------------------------------------|------------------|---------------------|------------|
| Nad-F<br>Nad-R               | TCCTACGGGAGGCAGCAGT<br>GGACTACCAGGGTATCTAATCCTGTT | 16S rRNA Eubacteria                                                | 57               | 91                  | (2)        |
| xyIM-AET01-F<br>xyIM-AET01-R | GTGATCCGAACCGAGACATTG<br>GCCTCAATCTTTATCGCATCTTTG | xylene monooxygenase isolate AET-5-01 ( <i>xyIM</i> )              | 55               | 94                  | This study |
| TOD-AET18-F<br>TOD-AET18-R   | GCTACCACGGGTGGGCTTACG<br>GCGGGCTCCATTCCTTCTGTTC   | toluene dioxygenase AET-5-VIII ( <i>tod</i> )                      | 58               | 101                 | This study |
| EXDO-AET18-F<br>EXDO-AET18-R | GCAAGCTAATGGCATGGATGAC<br>GGCGTGGCACCGTAGAAC      | catechol-2,3-dioxygenase isolate AET-5-VIII ( <i>exdo-AET-18</i> ) | 56               | 99                  | This study |
| TMO-AET14-F<br>TMO-AET-14-R  | GGATCGTCGGGCAGTTTGAAC<br>GTGCTGGTAGTCGAACCTCGTTG  | toluene monooxygenase isolate AET-6-14 ( <i>tmo</i> )              | 56               | 99                  | This study |
| PHE-AET14-F<br>PHE-AET14-R   | ACCTGTGTTCGTGCCGTTC<br>ATCCTGCTCCAGCATGAACCTG     | phenol hydroxylase isolate AET-6-14 ( <i>phe</i> )                 | 58               | 92                  | This study |
| EXDO-AET14-F<br>EXDO-AET14-R | GAGGTGCTGGGCTTCTTC<br>ACGTCGTGCCATGAATCC          | catechol-2,3-dioxygenase isolate AET-6-14 ( <i>exdo-AET-14</i> )   | 60               | 93                  | This study |

<sup>a</sup> This abbreviation is used to report the qPCR results

**Table S3.** Nucleotide sequence and description of catabolic gene probes hybridizing with PFRs DNA.

| ID Gene Bank number                  | Nucleotide sequence                                 | Description                                                                               |
|--------------------------------------|-----------------------------------------------------|-------------------------------------------------------------------------------------------|
| <b>Mono- and Di-oxygenases</b>       |                                                     |                                                                                           |
| YP_001110001                         | TGGGAGATGTACGTGCGAGCAGAACGGCGCGCGTGTTC AAGGATCTTGC  | methane/phenol/toluene hydroxylase <i>Burkholderia vietnamiensis</i> G4                   |
| AAL50373                             | CTAGAACAGGATCCGGACAACGTGCCCATCGTGCAGCGTGGATCGACAA   | TomA3 <i>Burkholderia cepacia</i>                                                         |
| NP_251202                            | GCCACCGTGCAGCACCCGAGCAGGTCGAGGCGGAGCGCGCGCGTGGC     | anthranilate dioxygenase large subunit <i>Pseudomonas aeruginosa</i> PAO1                 |
| BAB21463                             | CGAAGGGCGAGAGCGCCGAGAACCGCCACGCGCATCCGTCAGTACGAA    | chlorobenzoate 1,2-dioxygenase <i>Burkholderia</i> sp. NK8                                |
| YP_587013                            | GCGCTGGGCTAACC CGAAGATCGTCCGAACCTCGCCCGCCGCGAGGT    | benzoate 1,2-dioxygenase <i>Cupriavidus metallidurans</i> CH34                            |
| NP_887278                            | CGAGCGCCGAGGTGGGCGTCAAGGGCGCGCGCAACAGGCTGGAATAC     | hydroxylating alpha subunit of a dioxygenase system <i>Bordetella bronchiseptica</i> RB50 |
| <b>Extradiol dioxygenases</b>        |                                                     |                                                                                           |
| BAD72667                             | AGCATGACCGACACCTCGATCGACATCGGCCGACCCGCCACGGCCTGAC   | catechol 2,3-dioxygenase Uncultured bacterium                                             |
| BAD83302                             | TGGGCTTCAACCTGGCCGAGCAGGTTGTGCGCGTCCGACAAGCTGCAG    | catechol 2,3-dioxygenase Uncultured bacterium                                             |
| BAD72738                             | GAAGAAGAAGGTGTCGCTCGATCTCGGCCGACCCGCCACGGCATCACCC   | catechol 2,3-dioxygenase Uncultured bacterium                                             |
| BAH89638                             | AGGCCCGGGCAGTGAGCATCCGGTGTGACATGGACGAGGCGCTGTT      | catechol 2,3-dioxygenase Uncultured bacterium                                             |
| AAW81687                             | GGGCGTGAAGAGGTCAACCCAGAGCCTGGCCCGCGATCTGAAGGGTA     | catechol 2,3-dioxygenase <i>Pseudomonas fluorescens</i> PC36                              |
| AAW81688                             | GATTTCTATCACGACCGTGTGCTTACCGAGAGTTTCTGACCGTGATGA    | catechol 2,3-dioxygenase <i>Pseudomonas fluorescens</i> PC37                              |
| AAS75778                             | GTGCGATGCTGCAGTTCAATCTGCCGACGGCCATGAGATGCGCCTGTAC   | catechol 2,3-dioxygenase <i>Comamonas testosteroni</i> CC F3                              |
| BAH90217                             | AGGCGCATCTCGTCCCGTGGGCGCCTGAATGCAGCATGCGGCCGCT      | 2,3-dihydroxybiphenyl-1,2-dioxygenase Uncultured bacterium                                |
| BAH90326                             | TGGCCGCTGGGCGAGGTGAACCTGCAGCATGCGGCCGCTGGAGGGCAGCT  | catechol 2,3-dioxygenase Uncultured bacterium                                             |
| JE0127                               | GACCCGAAGGCAACATGCAGGCGCGCACCTGGATGGCCCGCACCCACAG   | catechol 2,3-dioxygenase (EC 1.13.11.2) <i>Pseudomonas</i> sp. Y 2                        |
| BAH90119                             | TGCTTGCCGAACGTGAGCACGAGCGCGCGCGCGCTCTTCCACACCTT     | 2,3-dihydroxybiphenyl-1,2-dioxygenase Uncultured bacterium                                |
| BAA25604                             | CCTGTCTCATGCGTCAAGCCGCTCGCAGCGGGCACGCCGCTGGAACGGAT  | 2,3-dihydroxybiphenyl 1,2-dioxygenase <i>Rhodococcus erythropolis</i> TA421               |
| ACG59214                             | ACACCGTCAGGGTTTGAGCTTGAGTTTGGTTGGGGCGCGCTGAGGTCA    | 3-isopropylcatechol-2,3-dioxygenase-like protein Uncultures bacterium                     |
| <b>Anaerobic toluene degradation</b> |                                                     |                                                                                           |
| BAD42366                             | TGGCCAAGTCGCACATCGAACAGGCCAGCCGAGATGGGCGCGTTCGCCCT  | putative benzylsuccinate synthase alpha subunit <i>Magnetospirillum</i> sp. TS-6          |
| AAx84174                             | ACCAGCCAGTGC GCGTGGGGTCCGGCCAGTTCTCGAGAACATCGCGCG   | putative benzoyl-CoA reductase <i>Thaueria aromatica</i>                                  |
| <b>Alkane Hydroxylases</b>           |                                                     |                                                                                           |
| YP_691842                            | ACTGCTTTGGGGTTGGCAGGGGGTGGTGTCTTCTTCTGGGGCAGAGTTTCT | alkane-1 monooxygenase <i>Alcanivorax borkumensis</i> SK2                                 |
| AAB70825                             | AGCGGGATGGCCACTGTGGTGTGAAAGTGAAC TGGGGCGGGCGGGCTAG  | xylene monooxygenase hydroxylase component <i>Pseudomonas putida</i>                      |
| YP_790621                            | GTGTGGGCCGCTGGCGTGTTCGTCGCTTCCAGGAGTGGGGCTGGCTCGG   | Alkane-1 monooxygenase <i>Pseudomonas aeruginosa</i> UCBPP-PA14                           |
| CAH56098                             | CGCCTCGCTTCGGTGAGAGTTTCTGGACTTCC TGGCCGCGAGTGTGTGG  | putative alkane hydroxylase Uncultured bacterium                                          |
| ABB96072                             | TCAACGCTGGCTGATGTCGGTGTCTCTTCCGGG TGTGCTCGTGGTGTG   | putative alkane monooxygenase Uncultured bacterium                                        |
| ABB96087                             | CGCCTGGGCGATGTCGGTGGTGTCTGGGGCGCATTTGTTGCTGCTTTCG   | putative alkane monooxygenase Uncultured bacterium                                        |
| ABB96096                             | GCTCAACGCGTGGCTGATGTCGGTGTCTTGTGGG TGGGCTGATGGTGT   | putative alkane monooxygenase Uncultured bacterium                                        |
| NP_771234                            | TTCTGGGCGCTGCTCTGGGCAAGGAGGCAAGGATGAACTGGAACGCCCG   | delta 9 acyl-lipid fatty acid desaturase <i>Bradyrhizobium diazoefficiens</i> USDA 110    |
| YP_552229                            | TTCTTGGGAGGATGGTGTGGATGCAAGCCTGCGTCA CCGTGAACCACA   | alkane 1-monooxygenase <i>Polaromonas</i> sp. JS666                                       |
| YP_921354                            | TGTGGGGCGCGCTGGTCCCTGGCTGGCGCGCGGCTGCTGCCGTACCTG    | alkane 1-monooxygenase <i>Nocardioides</i> sp. JS614                                      |
| NP_251264                            | GTCTGGGCCGCTGGCGTGTTCGTCGCTTCCAGGAGTGGGGCTGGCTCGG   | alkane-1 monooxygenase <i>Pseudomonas aeruginosa</i> PAO1                                 |

**Table S4. Phylogenetic assignment of phylotypes.** Classification of all phylotypes based on 16S rRNA analysis using RDP.

| Phylotype | Abundance (%) |       | Phylogenetic affiliation based on 16S rRNA gene sequence |                     |                                    |                                    |                                    |  |
|-----------|---------------|-------|----------------------------------------------------------|---------------------|------------------------------------|------------------------------------|------------------------------------|--|
|           | PFR-1         | PFR-2 | Phylum                                                   | Class               | Order                              | Family                             | Genus                              |  |
| 1         | 33.5          | 17.0  | Proteobacteria                                           | Betaproteobacteria  | Burkholderiales                    | Comamonadaceae                     | Curvibacter                        |  |
| 2         | 9.6           | 9.1   | Proteobacteria                                           | Betaproteobacteria  | Burkholderiales                    | Comamonadaceae                     | Simplicispira                      |  |
| 3         | 6.2           | 12.0  | Proteobacteria                                           | Gammaproteobacteria | Xanthomonadales                    | Xanthomonadaceae                   | Rudaea                             |  |
| 4         | 5.6           | 10.4  | Proteobacteria                                           | Gammaproteobacteria | Xanthomonadales                    | Xanthomonadaceae                   | Rudaea                             |  |
| 5         | 6.4           | 5.2   | Proteobacteria                                           | Gammaproteobacteria | Xanthomonadales                    | Xanthomonadaceae                   |                                    |  |
| 6         | 2.6           | 1.4   | TM7                                                      |                     |                                    |                                    | TM7_genera_incertae_sedis          |  |
| 7         | 2.4           | 1.9   | Proteobacteria                                           | Betaproteobacteria  | Burkholderiales                    |                                    |                                    |  |
| 9         | 2.4           | 0.1   | Proteobacteria                                           | Alphaproteobacteria | Rhizobiales                        | Bradyrhizobiaceae                  | Rhodoblastus                       |  |
| 10        | 0.5           | 5.9   | Proteobacteria                                           | Alphaproteobacteria | Rhodospirillales                   | Rhodospirillaceae                  | Magnetospirillum                   |  |
| 11        | 1.6           | 0.5   | Actinobacteria                                           | Actinobacteria      | Actinomycetales                    | Sporichthyaceae                    |                                    |  |
| 12        | 1.1           | 1.8   | Proteobacteria                                           | Betaproteobacteria  | Burkholderiales                    | Comamonadaceae                     |                                    |  |
| 13        | 1.5           | 1.1   | Proteobacteria                                           | Betaproteobacteria  | Burkholderiales                    | Burkholderiaceae                   | Burkholderia                       |  |
| 14        | 1.2           | 0.1   | Firmicutes                                               | Clostridia          | Clostridiales                      | Clostridiaceae 1                   | Clostridium sensu stricto          |  |
| 15        | 1.3           | 0.3   | Proteobacteria                                           | Betaproteobacteria  | Neisseriales                       | Neisseriaceae                      | Aquitalea                          |  |
| 16        | 0.8           | 0.0   | Proteobacteria                                           | Gammaproteobacteria |                                    |                                    |                                    |  |
| 17        | 0.1           | 2.4   | Proteobacteria                                           | Betaproteobacteria  | Rhodocyclales                      | Rhodocyclaceae                     | Zoogloea                           |  |
| 19        | 0.0           | 2.9   | Proteobacteria                                           | Gammaproteobacteria | Xanthomonadales                    | Xanthomonadaceae                   | Thermomonas                        |  |
| 20        | 0.6           | 0.8   | Bacteroidetes                                            | Sphingobacteria     | Sphingobacteriales                 | Sphingobacteriaceae                | Mucilaginibacter                   |  |
| 21        | 1.3           | 0.0   | Chlamydiae                                               | Chlamydiae          | Chlamydiales                       | Parachlamydiaceae                  | Parachlamydia                      |  |
| 22        | 0.6           | 0.1   | Acidobacteria                                            | Holophagae          | Holophagales                       | Holophagaceae                      | Geothrix                           |  |
| 23        | 0.1           | 2.0   | Proteobacteria                                           | Betaproteobacteria  |                                    |                                    |                                    |  |
| 24        | 0.8           | 0.0   | Proteobacteria                                           | Betaproteobacteria  | Burkholderiales                    | Burkholderiaceae                   | Cupriavidus                        |  |
| 25        | 0.6           | 0.1   | Verrucomicrobia                                          | Subdivision3        | Subdivision3_genera_incertae_sedis | Subdivision3_genera_incertae_sedis | Subdivision3_genera_incertae_sedis |  |
| 26        | 0.6           | 0.0   | Actinobacteria                                           | Actinobacteria      | Actinomycetales                    |                                    |                                    |  |
| 27        | 0.5           | 0.6   | Bacteroidetes                                            | Sphingobacteria     | Sphingobacteriales                 | Chitinophagaceae                   |                                    |  |
| 28        | 0.4           | 0.9   | Proteobacteria                                           | Gammaproteobacteria | Xanthomonadales                    | Xanthomonadaceae                   | Stenotrophomonas                   |  |
| 29        | 0.5           | 0.1   | Proteobacteria                                           | Betaproteobacteria  | Burkholderiales                    | Burkholderiaceae                   | Pandoraea                          |  |
| 31        | 0.2           | 1.2   | Bacteroidetes                                            | Sphingobacteria     | Sphingobacteriales                 | Chitinophagaceae                   |                                    |  |
| 32        | 0.5           | 0.0   | Proteobacteria                                           | Betaproteobacteria  | Burkholderiales                    | Burkholderiaceae                   | Burkholderia                       |  |
| 33        | 0.5           | 0.0   |                                                          |                     |                                    |                                    |                                    |  |
| 36        | 0.5           | 0.0   | Proteobacteria                                           | Betaproteobacteria  | Burkholderiales                    | Burkholderiaceae                   | Burkholderia                       |  |
| 37        | 0.4           | 0.1   |                                                          |                     |                                    |                                    |                                    |  |
| 38        | 0.5           | 0.0   |                                                          |                     |                                    |                                    |                                    |  |
| 39        | 0.4           | 0.1   | Proteobacteria                                           | Betaproteobacteria  | Rhodocyclales                      | Rhodocyclaceae                     | Azospira                           |  |
| 40        | 0.4           | 0.2   | Proteobacteria                                           | Gammaproteobacteria | Xanthomonadales                    | Sinobacteraceae                    | Steroidobacter                     |  |
| 41        | 0.4           | 0.1   | Bacteroidetes                                            | Bacteroidia         | Bacteroidales                      | Prevotellaceae                     | Prevotella                         |  |

| Phylotype | Abundance (%) |       | Phylogenetic affiliation based on 16S rRNA gene sequence |                     |                                    |                                    |                                    |
|-----------|---------------|-------|----------------------------------------------------------|---------------------|------------------------------------|------------------------------------|------------------------------------|
|           | PFR-1         | PFR-2 | Phylum                                                   | Class               | Order                              | Family                             | Genus                              |
| 42        | 0.2           | 0.6   | Proteobacteria                                           | Betaproteobacteria  | Burkholderiales                    | Burkholderiaceae                   | Ralstonia                          |
| 43        | 0.1           | 1.0   | Acidobacteria                                            | Holophagae          | Holophagales                       | Holophagaceae                      | Geothrix                           |
| 44        | 0.3           | 0.1   | Actinobacteria                                           | Actinobacteria      | Actinomycetales                    | Mycobacteriaceae                   | Mycobacterium                      |
| 45        | 0.3           | 0.1   | Proteobacteria                                           | Alphaproteobacteria | Rhizobiales                        |                                    |                                    |
| 46        | 0.0           | 2.0   | Proteobacteria                                           | Betaproteobacteria  | Burkholderiales                    | Burkholderiaceae                   | Burkholderia                       |
| 47        | 0.2           | 0.6   | Proteobacteria                                           | Betaproteobacteria  | Burkholderiales                    | Comamonadaceae                     |                                    |
| 48        | 0.2           | 0.2   | Proteobacteria                                           | Betaproteobacteria  | Burkholderiales                    | Alcaligenaceae                     |                                    |
| 49        | 0.3           | 0.0   | Proteobacteria                                           | Betaproteobacteria  | Burkholderiales                    | Oxalobacteraceae                   | Massilia                           |
| 50        | 0.2           | 0.1   | Actinobacteria                                           | Actinobacteria      | Actinomycetales                    | Microbacteriaceae                  | Leifsonia                          |
| 52        | 0.2           | 0.4   | Bacteroidetes                                            | Sphingobacteria     | Sphingobacteriales                 | Chitinophagaceae                   | Chitinophaga                       |
| 53        | 0.2           | 0.2   | Actinobacteria                                           | Actinobacteria      | Actinomycetales                    | Cellulomonadaceae                  | Cellulomonas                       |
| 54        | 0.0           | 1.0   | Acidobacteria                                            | Holophagae          | Holophagales                       | Holophagaceae                      | Geothrix                           |
| 55        | 0.2           | 0.1   | Proteobacteria                                           | Gammaproteobacteria |                                    |                                    |                                    |
| 56        | 0.2           | 0.2   | Proteobacteria                                           | Alphaproteobacteria | Rhizobiales                        | Bradyrhizobiaceae                  | Bradyrhizobium                     |
| 57        | 0.2           | 0.1   |                                                          |                     |                                    |                                    |                                    |
| 58        | 0.2           | 0.1   | Verrucomicrobia                                          | Subdivision3        | Subdivision3_genera_incertae_sedis | Subdivision3_genera_incertae_sedis | Subdivision3_genera_incertae_sedis |
| 60        | 0.2           | 0.0   | Proteobacteria                                           | Betaproteobacteria  | Burkholderiales                    | Burkholderiaceae                   | Paucimonas                         |
| 61        | 0.2           | 0.2   | Gemmatimonadetes                                         | Gemmatimonadetes    | Gemmatimonadales                   | Gemmatimonadaceae                  | Gemmatimonas                       |
| 62        | 0.2           | 0.5   | Proteobacteria                                           | Betaproteobacteria  | Burkholderiales                    | Burkholderiaceae                   | Cupriavidus                        |
| 63        | 0.2           | 0.1   | Proteobacteria                                           |                     |                                    |                                    |                                    |
| 64        | 0.0           | 0.7   | Proteobacteria                                           | Gammaproteobacteria |                                    |                                    |                                    |
| 65        | 0.1           | 0.0   | Proteobacteria                                           | Alphaproteobacteria | Alphaproteobacteria_incertae_sedis | Rhizomicrobium                     | Rhizomicrobium                     |
| 66        | 0.2           | 0.1   | Actinobacteria                                           | Actinobacteria      | Actinomycetales                    | Kineosporiaceae                    |                                    |
| 68        | 0.1           | 0.1   | Proteobacteria                                           | Alphaproteobacteria | Caulobacterales                    | Caulobacteraceae                   | Asticcacaulis                      |
| 69        | 0.2           | 0.1   | Bacteroidetes                                            | Bacteroidia         | Bacteroidales                      | Porphyromonadaceae                 | Paludibacter                       |
| 70        | 0.2           | 0.1   | Firmicutes                                               | Clostridia          | Clostridiales                      | Clostridiaceae 1                   | Clostridium sensu stricto          |
| 71        | 0.2           | 0.0   | Firmicutes                                               | Clostridia          | Clostridiales                      | Ruminococcaceae                    | Clostridium III                    |
| 72        | 0.0           | 0.5   | Proteobacteria                                           | Betaproteobacteria  | Burkholderiales                    | Oxalobacteraceae                   | Undibacterium                      |
| 73        | 0.1           | 0.6   | Proteobacteria                                           | Betaproteobacteria  | Burkholderiales                    | Comamonadaceae                     |                                    |
| 74        | 0.1           | 0.1   | Acidobacteria                                            | Holophagae          | Holophagales                       | Holophagaceae                      | Geothrix                           |
| 75        | 0.1           | 0.0   |                                                          |                     |                                    |                                    |                                    |
| 76        | 0.1           | 0.2   | Proteobacteria                                           | Alphaproteobacteria | Alphaproteobacteria_incertae_sedis | Rhizomicrobium                     | Rhizomicrobium                     |
| 78        | 0.2           | 0.0   | Verrucomicrobia                                          | Subdivision3        | Subdivision3_genera_incertae_sedis | Subdivision3_genera_incertae_sedis | Subdivision3_genera_incertae_sedis |
| 79        | 0.1           | 0.4   | Proteobacteria                                           | Betaproteobacteria  | Burkholderiales                    | Burkholderiales_incertae_sedis     | Thiomonas                          |
| 81        | 0.1           | 0.1   |                                                          |                     |                                    |                                    |                                    |
| 82        | 0.1           | 0.2   | Proteobacteria                                           | Betaproteobacteria  | Burkholderiales                    | Oxalobacteraceae                   | Massilia                           |
| 83        | 0.0           | 0.5   | Proteobacteria                                           | Alphaproteobacteria | Sphingomonadales                   | Sphingomonadaceae                  | Sphingomonas                       |
| 84        | 0.1           | 0.0   | Actinobacteria                                           | Actinobacteria      | Actinomycetales                    | Cellulomonadaceae                  | Cellulomonas                       |
| 85        | 0.1           | 0.0   | Proteobacteria                                           | Betaproteobacteria  | Rhodocyclales                      | Rhodocyclaceae                     |                                    |

| Phylotype | Abundance (%) |       | Phylogenetic affiliation based on 16S rRNA gene sequence |                           |                           |                           |                           |
|-----------|---------------|-------|----------------------------------------------------------|---------------------------|---------------------------|---------------------------|---------------------------|
|           | PFR-1         | PFR-2 | Phylum                                                   | Class                     | Order                     | Family                    | Genus                     |
| 86        | 0.1           | 0.0   | Proteobacteria                                           | Alphaproteobacteria       | Rhizobiales               | Methylocystaceae          |                           |
| 87        | 0.0           | 0.3   | Proteobacteria                                           | Alphaproteobacteria       | Rhizobiales               |                           |                           |
| 88        | 0.1           | 0.0   | Proteobacteria                                           | Gammaproteobacteria       | Xanthomonadales           | Xanthomonadaceae          |                           |
| 89        | 0.1           | 0.1   | Proteobacteria                                           | Betaproteobacteria        | Rhodocyclales             | Rhodocyclaceae            | Dechloromonas             |
| 90        | 0.1           | 0.0   | Proteobacteria                                           | Betaproteobacteria        | Neisseriales              | Neisseriaceae             | Aquitalea                 |
| 91        | 0.0           | 0.2   | Bacteroidetes                                            | Sphingobacteria           | Sphingobacteriales        | Chitinophagaceae          |                           |
| 93        | 0.1           | 0.2   | Proteobacteria                                           | Betaproteobacteria        | Rhodocyclales             | Rhodocyclaceae            |                           |
| 94        | 0.1           | 0.0   | Proteobacteria                                           |                           |                           |                           |                           |
| 95        | 0.1           | 0.0   | Proteobacteria                                           | Alphaproteobacteria       | Rhizobiales               | Bradyrhizobiaceae         |                           |
| 96        | 0.1           | 0.1   | Proteobacteria                                           | Alphaproteobacteria       | Rhizobiales               | Bradyrhizobiaceae         | Bradyrhizobium            |
| 97        | 0.0           | 0.4   | Proteobacteria                                           | Deltaproteobacteria       | Desulfuromonadales        | Geobacteraceae            | Geobacter                 |
| 98        | 0.1           | 0.1   |                                                          |                           |                           |                           |                           |
| 99        | 0.1           | 0.1   | Proteobacteria                                           | Betaproteobacteria        | Burkholderiales           | Comamonadaceae            |                           |
| 100       | 0.2           | 0.0   | Planctomycetes                                           | Planctomycetacia          | Planctomycetales          | Planctomycetaceae         |                           |
| 101       | 0.1           | 0.0   | Proteobacteria                                           | Betaproteobacteria        | Burkholderiales           | Oxalobacteraceae          | Undibacterium             |
| 103       | 0.1           | 0.0   | Verrucomicrobia                                          | Opitutae                  |                           |                           |                           |
| 104       | 0.1           | 0.0   | Firmicutes                                               | Bacilli                   | Bacillales                | Paenibacillaceae 2        | Ammoniphilus              |
| 105       | 0.1           | 0.1   | Acidobacteria                                            | Acidobacteria_Gp1         | Gp1                       | Gp1                       | Gp1                       |
| 106       | 0.1           | 0.0   | Chlamydiae                                               | Chlamydiae                | Chlamydiales              |                           |                           |
| 108       | 0.1           | 0.0   |                                                          |                           |                           |                           |                           |
| 110       | 0.1           | 0.0   | Actinobacteria                                           | Actinobacteria            | Actinomycetales           | Propionibacteriaceae      |                           |
| 111       | 0.1           | 0.1   | Proteobacteria                                           | Alphaproteobacteria       | Sphingomonadales          | Sphingomonadaceae         | Sphingomonas              |
| 112       | 0.1           | 0.0   | Bacteroidetes                                            | Sphingobacteria           | Sphingobacteriales        | Sphingobacteriaceae       | Mucilaginibacter          |
| 113       | 0.1           | 0.3   | Proteobacteria                                           | Alphaproteobacteria       | Sphingomonadales          | Sphingomonadaceae         | Sphingomonas              |
| 114       | 0.1           | 0.2   | Firmicutes                                               | Clostridia                | Clostridiales             | Lachnospiraceae           | Shuttleworthia            |
| 115       | 0.1           | 0.2   | Proteobacteria                                           | Betaproteobacteria        | Burkholderiales           | Oxalobacteraceae          |                           |
| 117       | 0.1           | 0.0   |                                                          |                           |                           |                           |                           |
| 118       | 0.1           | 0.0   | Chloroflexi                                              | Anaerolineae              |                           |                           |                           |
| 119       | 0.1           | 0.1   | Planctomycetes                                           | Planctomycetacia          | Planctomycetales          | Planctomycetaceae         | Gemmata                   |
| 120       | 0.1           | 0.0   | TM7                                                      | TM7_genera_incertae_sedis | TM7_genera_incertae_sedis | TM7_genera_incertae_sedis | TM7_genera_incertae_sedis |
| 121       | 0.0           | 0.4   | Bacteroidetes                                            | Sphingobacteria           | Sphingobacteriales        | Chitinophagaceae          |                           |
| 122       | 0.1           | 0.0   | Proteobacteria                                           | Betaproteobacteria        | Burkholderiales           | Alcaligenaceae            | Castellaniella            |
| 123       | 0.1           | 0.0   | Proteobacteria                                           | Alphaproteobacteria       | Rhodospirillales          | Rhodospirillaceae         | Magnetospirillum          |
| 124       | 0.0           | 0.1   | Proteobacteria                                           | Betaproteobacteria        | Burkholderiales           | Oxalobacteraceae          |                           |
| 125       | 0.1           | 0.0   | Bacteroidetes                                            | Sphingobacteria           | Sphingobacteriales        | Chitinophagaceae          |                           |
| 126       | 0.1           | 0.0   | Proteobacteria                                           | Alphaproteobacteria       | Rhodospirillales          | Rhodospirillaceae         | Magnetospirillum          |
| 127       | 0.1           | 0.0   | Proteobacteria                                           | Alphaproteobacteria       |                           |                           |                           |
| 128       | 0.1           | 0.0   | Proteobacteria                                           | Gammaproteobacteria       |                           |                           |                           |
| 129       | 0.1           | 0.0   |                                                          |                           |                           |                           |                           |

| Phylotype | Abundance (%) |       | Phylogenetic affiliation based on 16S rRNA gene sequence |                     |                                    |                     |                           |
|-----------|---------------|-------|----------------------------------------------------------|---------------------|------------------------------------|---------------------|---------------------------|
|           | PFR-1         | PFR-2 | Phylum                                                   | Class               | Order                              | Family              | Genus                     |
| 130       | 0.1           | 0.2   | Bacteroidetes                                            | Sphingobacteria     | Sphingobacteriales                 | Sphingobacteriaceae | Mucilaginitacter          |
| 132       | 0.1           | 0.0   | Planctomycetes                                           | Planctomycetacia    | Planctomycetales                   | Planctomycetaceae   | Planctomyces              |
| 133       | 0.0           | 0.2   | Proteobacteria                                           | Alphaproteobacteria | Rhodospirillales                   | Acetobacteraceae    | Acidisoma                 |
| 134       | 0.1           | 0.0   | Firmicutes                                               | Clostridia          | Clostridiales                      | Clostridiaceae 1    | Clostridium sensu stricto |
| 135       | 0.1           | 0.1   | Proteobacteria                                           | Deltaproteobacteria |                                    |                     |                           |
| 136       | 0.0           | 0.3   | Proteobacteria                                           | Betaproteobacteria  | Burkholderiales                    | Burkholderiaceae    | Burkholderia              |
| 137       | 0.0           | 0.2   | Proteobacteria                                           | Betaproteobacteria  | Burkholderiales                    | Alcaligenaceae      | Bordetella                |
| 140       | 0.0           | 0.3   | Bacteroidetes                                            |                     |                                    |                     |                           |
| 142       | 0.0           | 0.3   | Proteobacteria                                           | Gammaproteobacteria | Xanthomonadales                    | Xanthomonadaceae    |                           |
| 144       | 0.1           | 0.1   | Proteobacteria                                           | Alphaproteobacteria | Rhizobiales                        | Methylocystaceae    | Methylocystis             |
| 145       | 0.1           | 0.0   | Proteobacteria                                           | Gammaproteobacteria |                                    |                     |                           |
| 146       | 0.1           | 0.0   | Proteobacteria                                           | Alphaproteobacteria |                                    |                     |                           |
| 147       | 0.1           | 0.0   |                                                          |                     |                                    |                     |                           |
| 149       | 0.1           | 0.0   | Proteobacteria                                           | Alphaproteobacteria | Sphingomonadales                   | Sphingomonadaceae   |                           |
| 150       | 0.1           | 0.0   | Proteobacteria                                           | Betaproteobacteria  |                                    |                     |                           |
| 152       | 0.0           | 0.0   | Proteobacteria                                           | Deltaproteobacteria | Myxococcales                       |                     |                           |
| 153       | 0.0           | 0.2   | Proteobacteria                                           | Alphaproteobacteria | Rhodobacterales                    | Rhodobacteraceae    |                           |
| 154       | 0.0           | 0.2   | Verrucomicrobia                                          | Verrucomicrobiae    | Verrucomicrobiales                 | Verrucomicrobiaceae | Prosthecoacter            |
| 155       | 0.1           | 0.0   | Planctomycetes                                           | Planctomycetacia    | Planctomycetales                   | Planctomycetaceae   | Singulisphaera            |
| 157       | 0.1           | 0.0   |                                                          |                     |                                    |                     |                           |
| 158       | 0.0           | 0.2   | Proteobacteria                                           | Betaproteobacteria  | Burkholderiales                    | Comamonadaceae      | Pelomonas                 |
| 159       | 0.1           | 0.0   | Proteobacteria                                           |                     |                                    |                     |                           |
| 160       | 0.0           | 0.2   | Proteobacteria                                           | Betaproteobacteria  | Burkholderiales                    | Alcaligenaceae      |                           |
| 161       | 0.1           | 0.1   | Proteobacteria                                           | Alphaproteobacteria | Rhodospirillales                   | Acetobacteraceae    |                           |
| 162       | 0.1           | 0.0   |                                                          |                     |                                    |                     |                           |
| 164       | 0.1           | 0.0   |                                                          |                     |                                    |                     |                           |
| 165       | 0.0           | 0.1   | Planctomycetes                                           | Planctomycetacia    | Planctomycetales                   | Planctomycetaceae   |                           |
| 166       | 0.0           | 0.1   | Bacteroidetes                                            |                     |                                    |                     |                           |
| 167       | 0.1           | 0.0   | Firmicutes                                               | Negativicutes       | Selenomonadales                    |                     |                           |
| 168       | 0.1           | 0.1   | Chlamydiae                                               | Chlamydiae          | Chlamydiales                       |                     |                           |
| 169       | 0.1           | 0.0   | Actinobacteria                                           | Actinobacteria      | Acidimicrobiales                   |                     |                           |
| 170       | 0.0           | 0.0   |                                                          |                     |                                    |                     |                           |
| 171       | 0.0           | 0.2   | Bacteroidetes                                            | Sphingobacteria     | Sphingobacteriales                 | Chitinophagaceae    | Chitinophaga              |
| 173       | 0.1           | 0.1   | Actinobacteria                                           | Actinobacteria      | Acidimicrobiales                   |                     |                           |
| 174       | 0.1           | 0.0   | Proteobacteria                                           | Betaproteobacteria  | Burkholderiales                    |                     |                           |
| 175       | 0.1           | 0.0   | Planctomycetes                                           | Planctomycetacia    | Planctomycetales                   | Planctomycetaceae   |                           |
| 177       | 0.0           | 0.0   | Chloroflexi                                              | Anaerolineae        | Anaerolineales                     | Anaerolineaceae     |                           |
| 178       | 0.1           | 0.0   | Proteobacteria                                           | Alphaproteobacteria | Alphaproteobacteria_incertae_sedis | Rhizomicrobium      | Rhizomicrobium            |
| 179       | 0.0           | 0.1   | Proteobacteria                                           | Alphaproteobacteria | Rickettsiales                      | Rickettsiaceae      |                           |

| Phylotype | Abundance (%) |       | Phylogenetic affiliation based on 16S rRNA gene sequence |                     |                                    |                      |                           |
|-----------|---------------|-------|----------------------------------------------------------|---------------------|------------------------------------|----------------------|---------------------------|
|           | PFR-1         | PFR-2 | Phylum                                                   | Class               | Order                              | Family               | Genus                     |
| 180       | 0.0           | 0.1   | Proteobacteria                                           | Gammaproteobacteria |                                    |                      |                           |
| 181       | 0.0           | 0.1   | Proteobacteria                                           | Betaproteobacteria  |                                    |                      |                           |
| 182       | 0.0           | 0.1   | Bacteroidetes                                            | Sphingobacteria     | Sphingobacteriales                 | Chitinophagaceae     |                           |
| 184       | 0.1           | 0.0   | Firmicutes                                               | Clostridia          | Clostridiales                      | Clostridiaceae 1     | Clostridium sensu stricto |
| 185       | 0.0           | 0.1   | Proteobacteria                                           | Betaproteobacteria  | Burkholderiales                    | Comamonadaceae       |                           |
| 186       | 0.0           | 0.0   |                                                          |                     |                                    |                      |                           |
| 187       | 0.0           | 0.1   | Chlamydiae                                               | Chlamydiae          | Chlamydiales                       |                      |                           |
| 189       | 0.0           | 0.0   | Bacteroidetes                                            | Bacteroidia         | Bacteroidales                      | Porphyromonadaceae   | Paludibacter              |
| 190       | 0.0           | 0.0   | Firmicutes                                               | Clostridia          | Clostridiales                      | Clostridiaceae 1     | Clostridium sensu stricto |
| 191       | 0.0           | 0.0   | Proteobacteria                                           | Gammaproteobacteria | Legionellales                      | Legionellaceae       | Legionella                |
| 193       | 0.1           | 0.0   | Firmicutes                                               | Bacilli             | Bacillales                         | Bacillaceae 1        | Bacillus                  |
| 194       | 0.0           | 0.0   | Proteobacteria                                           | Betaproteobacteria  | Burkholderiales                    | Alcaligenaceae       | Achromobacter             |
| 195       | 0.0           | 0.0   | Proteobacteria                                           |                     |                                    |                      |                           |
| 196       | 0.0           | 0.1   | Proteobacteria                                           | Deltaproteobacteria | Myxococcales                       | Polyangiaceae        |                           |
| 198       | 0.1           | 0.0   | Proteobacteria                                           | Alphaproteobacteria | Rhizobiales                        | Bradyrhizobiaceae    | Bradyrhizobium            |
| 199       | 0.0           | 0.0   | Proteobacteria                                           | Alphaproteobacteria | Alphaproteobacteria_incertae_sedis | Rhizomicrobium       | Rhizomicrobium            |
| 201       | 0.0           | 0.1   | Proteobacteria                                           | Alphaproteobacteria | Sphingomonadales                   | Sphingomonadaceae    |                           |
| 203       | 0.1           | 0.1   | Proteobacteria                                           | Alphaproteobacteria | Rhizobiales                        | Rhizobiaceae         | Rhizobium                 |
| 204       | 0.0           | 0.0   | Proteobacteria                                           | Alphaproteobacteria |                                    |                      |                           |
| 205       | 0.0           | 0.0   | Proteobacteria                                           | Gammaproteobacteria |                                    |                      |                           |
| 206       | 0.0           | 0.0   | Firmicutes                                               | Clostridia          | Clostridiales                      | Ruminococcaceae      |                           |
| 207       | 0.0           | 0.1   | Chlorobi                                                 | Ignavibacteria      | Ignavibacteriales                  | Ignavibacteriaceae   | Ignavibacterium           |
| 208       | 0.0           | 0.0   | Proteobacteria                                           | Alphaproteobacteria | Rhizobiales                        |                      |                           |
| 210       | 0.0           | 0.0   | Acidobacteria                                            | Acidobacteria_Gp3   | Gp3                                | Gp3                  | Gp3                       |
| 211       | 0.0           | 0.0   | Firmicutes                                               | Clostridia          | Clostridiales                      | Clostridiaceae 1     | Clostridium sensu stricto |
| 213       | 0.0           | 0.1   | Proteobacteria                                           | Alphaproteobacteria | Sphingomonadales                   | Sphingomonadaceae    | Novosphingobium           |
| 214       | 0.0           | 0.1   | Chlorobi                                                 | Ignavibacteria      | Ignavibacteriales                  | Ignavibacteriaceae   | Ignavibacterium           |
| 215       | 0.0           | 0.0   |                                                          |                     |                                    |                      |                           |
| 216       | 0.0           | 0.0   | Proteobacteria                                           | Alphaproteobacteria | Sphingomonadales                   | Sphingomonadaceae    |                           |
| 217       | 0.0           | 0.0   |                                                          |                     |                                    |                      |                           |
| 218       | 0.0           | 0.0   | Firmicutes                                               | Bacilli             | Bacillales                         | Paenibacillaceae 1   |                           |
| 219       | 0.0           | 0.0   | Bacteroidetes                                            | Bacteroidia         | Bacteroidales                      | Porphyromonadaceae   | Paludibacter              |
| 220       | 0.0           | 0.0   | Proteobacteria                                           | Betaproteobacteria  | Rhodocyclales                      | Rhodocyclaceae       | Zoogloea                  |
| 221       | 0.0           | 0.0   | Proteobacteria                                           | Alphaproteobacteria | Rhizobiales                        | Methylocystaceae     | Methylocystis             |
| 222       | 0.0           | 0.0   | Firmicutes                                               | Negativicutes       | Selenomonadales                    | Veillonellaceae      |                           |
| 223       | 0.0           | 0.1   | Bacteroidetes                                            | Sphingobacteria     | Sphingobacteriales                 | Chitinophagaceae     |                           |
| 224       | 0.1           | 0.0   | Chloroflexi                                              | Anaerolineae        | Anaerolineales                     | Anaerolineaceae      | Anaerolinea               |
| 225       | 0.0           | 0.0   | Proteobacteria                                           | Betaproteobacteria  | Burkholderiales                    | Comamonadaceae       |                           |
| 226       | 0.0           | 0.0   | Actinobacteria                                           | Actinobacteria      | Actinomycetales                    | Propionibacteriaceae |                           |

| Phylotype | Abundance (%) |       | Phylogenetic affiliation based on 16S rRNA gene sequence |                           |                                    |                                    |                                    |
|-----------|---------------|-------|----------------------------------------------------------|---------------------------|------------------------------------|------------------------------------|------------------------------------|
|           | PFR-1         | PFR-2 | Phylum                                                   | Class                     | Order                              | Family                             | Genus                              |
| 228       | 0.1           | 0.0   | Planctomycetes                                           | Planctomycetacia          | Planctomycetales                   | Planctomycetaceae                  | Singulisphaera                     |
| 229       | 0.0           | 0.0   | Proteobacteria                                           | Alphaproteobacteria       | Rhodospirillales                   |                                    |                                    |
| 230       | 0.0           | 0.0   | Bacteroidetes                                            | Sphingobacteria           | Sphingobacteriales                 | Chitinophagaceae                   |                                    |
| 232       | 0.0           | 0.0   | Proteobacteria                                           | Betaproteobacteria        |                                    |                                    |                                    |
| 234       | 0.0           | 0.0   | Proteobacteria                                           | Betaproteobacteria        | Burkholderiales                    | Burkholderiales_incertae_sedis     | Aquabacterium                      |
| 235       | 0.0           | 0.1   | Armatimonadetes                                          | Armatimonadetes_gp5       | Armatimonadetes_gp5                | Armatimonadetes_gp5                | Armatimonadetes_gp5                |
| 238       | 0.0           | 0.1   | Proteobacteria                                           | Alphaproteobacteria       | Rhizobiales                        |                                    |                                    |
| 239       | 0.0           | 0.0   | Proteobacteria                                           | Alphaproteobacteria       | Rhizobiales                        | Bradyrhizobiaceae                  | Afipia                             |
| 240       | 0.0           | 0.0   | WS3                                                      | WS3_genera_incertae_sedis | WS3_genera_incertae_sedis          | WS3_genera_incertae_sedis          | WS3_genera_incertae_sedis          |
| 241       | 0.0           | 0.0   | Firmicutes                                               | Bacilli                   | Bacillales                         | Pasteuriaceae                      | Pasteuria                          |
| 242       | 0.0           | 0.0   | Proteobacteria                                           | Deltaproteobacteria       |                                    |                                    |                                    |
| 243       | 0.0           | 0.0   | Firmicutes                                               | Clostridia                | Clostridiales                      | Clostridiaceae 1                   | Clostridium sensu stricto          |
| 244       | 0.0           | 0.0   | Deinococcus-Thermus                                      | Deinococci                | Thermales                          | Thermaceae                         | Meiothermus                        |
| 245       | 0.0           | 0.0   | Firmicutes                                               | Clostridia                | Clostridiales                      | Clostridiaceae 1                   | Fervidicella                       |
| 247       | 0.1           | 0.0   | Actinobacteria                                           | Actinobacteria            | Actinomycetales                    | Mycobacteriaceae                   | Mycobacterium                      |
| 248       | 0.0           | 0.0   | Proteobacteria                                           | Alphaproteobacteria       | Alphaproteobacteria_incertae_sedis | Rhizomicrobium                     | Rhizomicrobium                     |
| 249       | 0.0           | 0.1   | Proteobacteria                                           | Deltaproteobacteria       | Desulfuromonadales                 | Geobacteraceae                     | Geobacter                          |
| 250       | 0.0           | 0.1   | Armatimonadetes                                          | Armatimonadetes_gp5       | Armatimonadetes_gp5                | Armatimonadetes_gp5                | Armatimonadetes_gp5                |
| 251       | 0.0           | 0.0   | TM7                                                      | TM7_genera_incertae_sedis | TM7_genera_incertae_sedis          | TM7_genera_incertae_sedis          | TM7_genera_incertae_sedis          |
| 252       | 0.0           | 0.0   |                                                          |                           |                                    |                                    |                                    |
| 253       | 0.0           | 0.0   | Bacteroidetes                                            | Sphingobacteria           | Sphingobacteriales                 | Chitinophagaceae                   | Sediminibacterium                  |
| 254       | 0.0           | 0.0   | Proteobacteria                                           | Betaproteobacteria        | Burkholderiales                    | Comamonadaceae                     | Simplicispira                      |
| 255       | 0.1           | 0.0   | Proteobacteria                                           | Gammaproteobacteria       | Xanthomonadales                    | Xanthomonadaceae                   | Pseudoxanthomonas                  |
| 257       | 0.0           | 0.0   | Actinobacteria                                           | Actinobacteria            | Actinomycetales                    | Microbacteriaceae                  |                                    |
| 258       | 0.0           | 0.0   | Proteobacteria                                           | Deltaproteobacteria       | Myxococcales                       |                                    |                                    |
| 259       | 0.0           | 0.0   | Proteobacteria                                           | Gammaproteobacteria       | Legionellales                      | Legionellaceae                     | Legionella                         |
| 260       | 0.0           | 0.0   | Chloroflexi                                              |                           |                                    |                                    |                                    |
| 262       | 0.0           | 0.0   | Proteobacteria                                           | Betaproteobacteria        | Rhodocyclales                      | Rhodocyclaceae                     |                                    |
| 263       | 0.0           | 0.1   | Bacteroidetes                                            | Sphingobacteria           | Sphingobacteriales                 | Chitinophagaceae                   |                                    |
| 264       | 0.0           | 0.0   | Acidobacteria                                            | Acidobacteria_Gp3         | Gp3                                | Gp3                                | Gp3                                |
| 265       | 0.0           | 0.0   | Proteobacteria                                           | Betaproteobacteria        | Rhodocyclales                      | Rhodocyclaceae                     | Uliginosibacterium                 |
| 267       | 0.0           | 0.0   | Proteobacteria                                           | Gammaproteobacteria       | Legionellales                      | Legionellaceae                     | Legionella                         |
| 268       | 0.0           | 0.1   | Proteobacteria                                           | Gammaproteobacteria       | Pseudomonadales                    | Pseudomonadaceae                   | Pseudomonas                        |
| 270       | 0.0           | 0.0   | Verrucomicrobia                                          | Subdivision3              | Subdivision3_genera_incertae_sedis | Subdivision3_genera_incertae_sedis | Subdivision3_genera_incertae_sedis |
| 271       | 0.0           | 0.1   | Proteobacteria                                           | Alphaproteobacteria       | Caulobacterales                    | Caulobacteraceae                   |                                    |
| 274       | 0.0           | 0.0   | Proteobacteria                                           | Deltaproteobacteria       | Desulfuromonadales                 | Geobacteraceae                     | Geobacter                          |
| 275       | 0.0           | 0.1   | Proteobacteria                                           | Betaproteobacteria        |                                    |                                    |                                    |
| 276       | 0.1           | 0.0   | Firmicutes                                               | Clostridia                | Clostridiales                      | Clostridiaceae 1                   | Clostridium sensu stricto          |
| 280       | 0.0           | 0.1   | Bacteroidetes                                            | Sphingobacteria           | Sphingobacteriales                 | Sphingobacteriaceae                | Mucilagibacter                     |



| Phylotype | Abundance (%) |       | Phylogenetic affiliation based on 16S rRNA gene sequence |                     |                                    |                                    |                                    |
|-----------|---------------|-------|----------------------------------------------------------|---------------------|------------------------------------|------------------------------------|------------------------------------|
|           | PFR-1         | PFR-2 | Phylum                                                   | Class               | Order                              | Family                             | Genus                              |
| 281       | 0.0           | 0.0   | Planctomycetes                                           | Planctomycetacia    | Planctomycetales                   | Planctomycetaceae                  |                                    |
| 282       | 0.0           | 0.0   | Planctomycetes                                           | Planctomycetacia    | Planctomycetales                   | Planctomycetaceae                  | Singulisphaera                     |
| 286       | 0.0           | 0.0   | Chlamydiae                                               | Chlamydiae          | Chlamydiales                       | Parachlamydiaceae                  |                                    |
| 287       | 0.0           | 0.0   | Actinobacteria                                           | Actinobacteria      | Actinomycetales                    | Mycobacteriaceae                   | Mycobacterium                      |
| 290       | 0.0           | 0.0   | Proteobacteria                                           | Gammaproteobacteria |                                    |                                    |                                    |
| 291       | 0.0           | 0.1   | Bacteroidetes                                            | Sphingobacteria     | Sphingobacteriales                 | Chitinophagaceae                   |                                    |
| 299       | 0.0           | 0.0   | Proteobacteria                                           | Gammaproteobacteria |                                    |                                    |                                    |
| 302       | 0.0           | 0.0   | Firmicutes                                               | Clostridia          | Clostridiales                      | Clostridiaceae 1                   | Clostridium sensu stricto          |
| 304       | 0.0           | 0.0   | Verrucomicrobia                                          | Subdivision3        | Subdivision3_genera_incertae_sedis | Subdivision3_genera_incertae_sedis | Subdivision3_genera_incertae_sedis |
| 308       | 0.0           | 0.1   | Proteobacteria                                           | Deltaproteobacteria | Desulfuromonadales                 | Geobacteraceae                     | Geobacter                          |
| 311       | 0.0           | 0.1   | Chlorobi                                                 | Ignavibacteria      | Ignavibacteriales                  | Ignavibacteriaceae                 | Ignavibacterium                    |
| 312       | 0.0           | 0.1   | Planctomycetes                                           | Planctomycetacia    | Planctomycetales                   | Planctomycetaceae                  | Singulisphaera                     |
| 319       | 0.0           | 0.0   | Actinobacteria                                           | Actinobacteria      | Actinomycetales                    | Microbacteriaceae                  |                                    |
| 324       | 0.0           | 0.0   | Proteobacteria                                           | Gammaproteobacteria | Xanthomonadales                    | Xanthomonadaceae                   |                                    |
| 328       | 0.0           | 0.1   | Proteobacteria                                           | Deltaproteobacteria | Syntrophobacteriales               | Syntrophobacteraceae               | Desulfovirga                       |
| 333       | 0.0           | 0.1   | Proteobacteria                                           | Betaproteobacteria  | Burkholderiales                    | Burkholderiaceae                   | Burkholderia                       |
| 334       | 0.0           | 0.1   | Proteobacteria                                           | Betaproteobacteria  | Burkholderiales                    | Alcaligenaceae                     | Achromobacter                      |
| 337       | 0.0           | 0.0   | Proteobacteria                                           | Betaproteobacteria  | Burkholderiales                    | Comamonadaceae                     | Malikia                            |
| 343       | 0.0           | 0.1   | Proteobacteria                                           | Betaproteobacteria  | Nitrosomonadales                   | Nitrosomonadaceae                  | Nitrosospira                       |
| 345       | 0.0           | 0.1   | Proteobacteria                                           | Deltaproteobacteria | Bdellovibrionales                  | Bdellovibrionaceae                 | Bdellovibrio                       |
| 354       | 0.0           | 0.0   | Proteobacteria                                           | Gammaproteobacteria | Legionellales                      | Legionellaceae                     | Legionella                         |
| 355       | 0.0           | 0.0   | Cyanobacteria/Chloroplast                                | Chloroplast         | Chloroplast                        | Chloroplast                        | Chlorarachniophyceae               |
| 362       | 0.0           | 0.0   | Proteobacteria                                           | Gammaproteobacteria | Xanthomonadales                    | Xanthomonadaceae                   |                                    |
| 381       | 0.0           | 0.1   | Proteobacteria                                           | Betaproteobacteria  | Burkholderiales                    | Comamonadaceae                     |                                    |
| 400       | 0.0           | 0.0   | Proteobacteria                                           | Deltaproteobacteria | Desulfuromonadales                 | Geobacteraceae                     | Geobacter                          |
| 401       | 0.0           | 0.1   | Proteobacteria                                           | Alphaproteobacteria | Rhizobiales                        | Xanthobacteraceae                  | Pseudolabrys                       |
| 454       | 0.0           | 0.1   | Proteobacteria                                           | Betaproteobacteria  | Burkholderiales                    | Burkholderiaceae                   | Burkholderia                       |

## REFERENCES SUPPLEMENTARY MATERIAL

1. **Parales RE, Parales JV, Pelletier DA, Ditt JL.** 2008. Diversity of microbial toluene degradation pathways. *Adv Appl Microbiol* **64**:1-73.
2. **Nadkarni MA, Martin FE, Jacques NA, Hunter N.** 2002. Determination of bacterial load by real-time PCR using a broad-range (universal) probe and primers set. *Microbiology* **148**:257-266.
